# Effect of Performance Deficiencies on Graduation and Board Certification Rates

## A 10-yr Multicenter Study of Anesthesiology Residents

Judi A. Turner, M.D., Ph.D., Michael G. Fitzsimons, M.D., Manuel C. Pardo, Jr., M.D., Joy L. Hawkins, M.D., Yue Ming Huang, Ed.D., M.H.S., Maria D. D. Rudolph, M.D., Mary A. Keyes, M.D., Kimberly J. Howard-Quijano, M.D., M.S., Natale Z. Naim, M.D., Jack C. Buckley, M.D., Tristan R. Grogan, M.S., Randolph H. Steadman, M.D., M.S.

### ABSTRACT

**Background:** This multicenter, retrospective study was conducted to determine how resident performance deficiencies affect graduation and board certification.

**Methods:** Primary documents pertaining to resident performance were examined over a 10-yr period at four academic anesthesiology residencies. Residents entering training between 2000 and 2009 were included, with follow-up through February 2016. Residents receiving actions by the programs' Clinical Competency Committee were categorized by the area of deficiency and compared to peers without deficiencies.

**Results:** A total of 865 residents were studied (range: 127 to 275 per program). Of these, 215 residents received a total of 405 actions from their respective Clinical Competency Committee. Among those who received an action compared to those who did not, the proportion graduating differed (93 vs. 99%, respectively,  $P < 0.001$ ), as did the proportion achieving board certification (89 vs. 99%, respectively,  $P < 0.001$ ). When a single deficiency in an Essential Attribute (e.g., ethical, honest, respectful behavior; absence of impairment) was identified, the proportion graduating dropped to 55%. When more than three Accreditation Council for Graduate Medical Education Core Competencies were deficient, the proportion graduating also dropped significantly.

**Conclusions:** Overall graduation and board certification rates were consistently high in residents with no, or isolated, deficiencies. Residents deficient in an Essential Attribute, or multiple competencies, are at high risk of not graduating or achieving board certification. More research is needed on the effectiveness and selective deployment of remediation efforts, particularly for high-risk groups. (*ANESTHESIOLOGY* 2016; 125:221-9)

RESIDENCY programs have a responsibility to the public and to their residents to train competent medical specialists. To fulfill this mission, residency programs monitor the progress of their residents through supervision, evaluations, and examinations. When trainees are observed to experience personal, professional, or academic difficulties, the residency program intervenes to assist these residents.

Residents with performance concerns have been extensively studied.<sup>1-22</sup> The prevalence of residents with performance deficiencies has been reported between 6 and 26% across specialties including psychiatry, family medicine, internal medicine, and general surgery.<sup>1,9,10,17</sup> These residents have been referred to variously as “problem residents,”

### What We Already Know about This Topic

- Whether deficiencies noted in trainees by Clinical Competency Committees are reflected in graduation and board certification rates in anesthesiology is unknown

### What This Article Tells Us That Is New

- In a review of 865 residents from four U.S. programs with up to 16 yr of follow-up, residents who were deemed deficient in an Essential Attribute or in multiple competencies were at high risk for not graduating or achieving board certification

“residents in difficulty,” “troublesome residents,” “problem learners,” and “residents in trouble.”<sup>1</sup> We have chosen the term “residents in trouble,” since it conveys the attitude of

Submitted for publication July 13, 2015. Accepted for publication March 28, 2016. From the Departments of Anesthesiology and Perioperative Medicine (J.A.T., Y.M.H., M.A.K., K.J.H.-Q., N.Z.N., J.C.B., R.H.S.), Medicine Statistics Core (T.R.G.), and UCLA Simulation Center (M.D.D.R.), David Geffen School of Medicine at University of California, Los Angeles, Los Angeles, California; Department of Anesthesia, Critical Care and Pain Medicine, Harvard Medical School, Massachusetts General Hospital, Boston, Massachusetts (M.G.F.); Department of Anesthesia and Perioperative Care, University of California, San Francisco, San Francisco, California (M.C.P.); and Department of Anesthesiology, University of Colorado School of Medicine, Denver, Colorado (J.L.H.).

Copyright © 2016, the American Society of Anesthesiologists, Inc. Wolters Kluwer Health, Inc. All Rights Reserved. *Anesthesiology* 2016; 125:221-9

concern for the performance and improvement of trainees, as we might say when our patients are “in trouble.”

The methods used to study residents in trouble vary. The majority of studies used surveys of program directors to establish the prevalence of residents with deficiencies, the most commonly deficient categories, and the remediation strategies. Results are subject to both response and recall bias. In addition, surveys typically report cross-sectional data, which are less useful in determining the proportion of residents who graduate and become board certified.

The 1999 landmark survey of the Association of Program Directors in Internal Medicine identified a 7% point prevalence of “problem residents” (defined by the American Board of Internal Medicine as “a trainee who demonstrates a significant enough problem that requires intervention by someone of authority”); 94% of programs had problem residents.<sup>18</sup> The most frequently identified problems were medical knowledge, poor clinical judgment, and inefficient use of time. A 2012 update of this survey describing deficiencies in terms of Accreditation Council for Graduate Medical Education (ACGME) Core Competencies showed that the most commonly deficient ACGME Core Competencies were Medical Knowledge, Patient Care, and Interpersonal Communication.<sup>20</sup>

The prevalence of residents in trouble has also been assessed through single-center longitudinal studies within one specialty, allowing determination of graduation and board certification rates. A single-center 10-yr longitudinal study of surgical residents reported that 21% of 115 residents performed poorly; 75% (18 of 24) of these residents graduated. Deficits clustered around medical knowledge and its application, personal problems, including health, and interpersonal skills/professionalism.<sup>21</sup> A 25-yr retrospective analysis of 230 family medicine residents at a single site revealed a 9% prevalence of residents in trouble. The most common deficits identified were in medical knowledge, attitudinal problems, and interpersonal conflict.<sup>1</sup>

Despite the considerable literature on “residents in trouble,” the effect of performance gaps on graduation and board certification has not been well characterized, including in anesthesiology. There are currently over 130 U.S. anesthesiology programs accredited by the ACGME. Each program reports resident physician performance to the American Board of Anesthesiology (ABA). The aim of this 10-yr multicenter study is to report the prevalence of unsatisfactory performance, characterize the nature of performance gaps, and examine their effect on graduation and board certification.

## Materials and Methods

With local Institutional Review Board approval (University of California at Los Angeles, Los Angeles, California), we performed a multicenter retrospective review of anesthesiology residents’ files. Residents entering anesthesia year 1 (postgraduate year [PGY]-2) training between 2000 and 2009 were included in the analysis. Data sources reviewed

included: Clinical Competence Committee (CCC) reports; Residency Program Director memoranda; and the semiannual American Board of Anesthesiology Training Reports (ABA Record of Training/CCC Report) in force during the study period (table 1).

The CCC is an ABA- and ACGME-mandated body composed of faculty members who meet regularly (two to four times per year) to assess resident performance. The role of the CCC is to track and evaluate resident performance in order to follow the progress of residents in the program and advise the Program Director regarding suitability for graduation and independent practice.

The ABA Record of Training/CCC Report assesses resident performance based on seven “Essential Attributes” (qualities of character and professionalism deemed “essential” by the ABA; these attributes map to elements of the ACGME Core Competencies of Professionalism, Patient Care, and Interpersonal and Communication Skills), six ACGME Core Competencies, and four Clinical Skills outlined in table 1. The Chair of the CCC and Program Director are responsible for reporting resident performance to the ABA.

Each CCC at the respective residency programs established and implemented its own specific policies and procedures to evaluate the performance and progress of trainees. A pattern of poor evaluations resulted in CCC action. CCC actions included counseling, letter of concern, Unsatisfactory ABA Training Report, probation, and, if deficiencies were not resolved after successive attempts at remediation, forced resignation or dismissal. Of the range of CCC actions, only the ABA Training Reports could be compared across programs in this study. The criteria driving other actions, for example, placing a resident on probation, are unique to each institution and were therefore not amenable to comparison. Each program devised its own approach to remediation in general, which was tailored to the unique needs of each of the referred residents.

## Study Sites

The four study sites were Massachusetts General Hospital, Boston, Massachusetts; University of California, Los Angeles (serving as the coordinating site), Los Angeles, California; University of California, San Francisco, San Francisco, California; and University of Colorado School of Medicine, Denver, Colorado. During the period under review, there were three Program Directors and a single CCC Chair at University of California, Los Angeles; two Program Directors and a single CCC Chair at University of California, San Francisco; and a single Program Director and single CCC Chair at Massachusetts General Hospital and University of Colorado School of Medicine. All sites are ACGME-accredited anesthesiology residency programs.

## Data Collection and Outcome Measures

Residents from the four training programs who commenced clinical anesthesia year 1 between 2000 and 2009 were included in the analysis, including residents who transferred

**Table 1.** Graded Components of the ABA Record of Training/Clinical Competence Committee Report\* Used during the Study Period**Essential Attributes**

1. Demonstrates high standards of ethical and moral behavior.
2. Demonstrates honesty, integrity, reliability, and responsibility.
3. Learns from experience; knows limits.
4. Reacts to stressful situations in an appropriate manner.
5. Has no documented abuse of alcohol or illegal use of drugs during this report period.
6. Has no cognitive, physical, sensory, or motor impairment that precludes acquiring and processing information in an independent and timely manner.
7. Demonstrates respect for the dignity of patients and colleagues, and sensitivity to a diverse patient population.

**Core Competencies****Patient Care**

1. Demonstrates patient care that is compassionate, appropriate, and effective for the treatment of health problems and the promotion of health.
2. Respects patient privacy.
3. Demonstrates appropriate concern for patients and a commitment to carrying out professional responsibilities.
4. Is an advocate for quality care.
5. Demonstrates use of a sound background in general medicine in the management of problems relevant to the specialty of anesthesiology.
6. Recognizes the adequacy of preoperative preparation of patients for anesthesia and surgery, and recommends appropriate steps when preparation is inadequate.
7. Selects anesthetic and adjuvant drugs and techniques for rational, appropriate, patient-centered, and cost-effective anesthetic management.
8. Recognizes and responds appropriately to significant changes in the anesthetic course.
9. Provides appropriate postanesthetic care.
10. Provides appropriate consultative support for patients who are critically ill.
11. Evaluates, diagnoses, and selects appropriate therapy for acute and chronic pain disorders.

**Medical Knowledge**

1. Possesses an appropriate fund of medical knowledge.
2. Is appropriately self-confident; recognizes gaps in knowledge and expertise.
3. Demonstrates medical knowledge about established and evolving biomedical, clinical, and cognate sciences, as well as the application of this knowledge to patient care.

**Practice-based Learning and Improvement**

1. Demonstrates learning and improvement that involves the investigation and evaluation of care for patients, the appraisal and assimilation of scientific evidence, and improvements in patient care.
2. Is committed to practice-based learning and improvement.
3. Possesses business skills important for effective practice management.
4. Is complete, accurate, and timely in record keeping.

**Interpersonal and Communication Skills**

1. Demonstrates effective interpersonal and communication skills that result in the effective exchange of information and collaboration with patients, their families, and other healthcare professionals.
2. Is adaptable and flexible.
3. Is careful and thorough.

**Professionalism**

1. Demonstrates a commitment to carrying out professional responsibilities.
2. Adheres to ethical principles.
3. Demonstrates sensitivity to a diverse patient population.

**Systems-based Practice**

1. Demonstrates an understanding of the healthcare system and the ability to effectively call on system resources to provide optimal patient care.
2. Demonstrates an awareness of and responsiveness to the larger context and system of health care.

**Clinical Skills**

1. General preparation
2. General anesthesia
3. Regional anesthesia and pain management
4. Special procedures

**Overall Clinical Competence**

**Essential Attributes** and **Overall Clinical Competence** were graded as Satisfactory (meets reasonable expectations) or Unsatisfactory (falls short of reasonable expectations). Overall Clinical Competence was graded as Satisfactory only if the grade for every Essential Attribute was Satisfactory. If Overall Clinical Competence was Unsatisfactory, a description of the anesthesiologist's most serious deficiencies was submitted with the report. **Core Competency skills** were graded as Satisfactory (meets reasonable expectations), Unsatisfactory (falls short of reasonable expectations), or Not Applicable (used only for those categories not required of the resident during the reporting period).

\*Adapted with permission from the American Board of Anesthesiology (ABA).

into the program at the PGY-2 level or beyond (the years devoted exclusively to training in clinical anesthesia). Since reporting criteria differ between residents and interns, only PGY-2 through PGY-4 residents were included in the study. Performance reports through 2012 were reviewed in

order to include data for the class entering in 2009. ABA reports through February 2016 were used to assess board certification.

The Program Director, CCC Chair, or their designees compiled data at each site. They reviewed source documents,

which included ABA Training Reports, CCC minutes, e-mails, and individual resident files. Data were deidentified and abstracted into a single database that included year of entry into the residency program, program site, and, if applicable, year of the first CCC action, level of training at the time of CCC action, the type of action, and the ACGME Core Competencies of concern. In addition, if the resident received one or more *Unsatisfactory* designations on the ABA Record of Training/CCC Report, the database included a notation of the primary *Unsatisfactory* attribute or competency, in the judgment of the training program. Outcomes measured included whether the training program was completed (graduation) and whether ABA Board Certification was attained.

### Statistical Analysis

Descriptive statistics were summarized using frequencies and percentages in contingency table format. In order to test for site-to-site differences, or test other associations including types of deficiencies, actions, and outcomes, we used the Pearson chi-square test or Fisher exact test as appropriate. These tests were carried out using JMP Pro 12 (SAS Institute, USA).

For assessing binary outcomes (graduation or ABA certification), generalized logistic mixed effects models were constructed. Due to site-to-site variation discovered in our descriptive analysis, a random site effect was added to these models (tables 2 to 6). Mixed effects models were constructed using SAS 9.4 (SAS Institute).

In order to adjust for multiple comparisons, Bonferroni correction was used. *P* values less than 0.0036 were considered statistically significant after the adjustment ( $\alpha$  0.05/14 tests = adjusted  $\alpha$  of 0.0036).

Given that the follow-up period was shorter for subjects who entered late in the study period, we analyzed time from

graduation to board certification, and then performed a sensitivity analysis of the impact of the follow-up period on board certification rates.

## Results

### Prevalence of Residents in Trouble

The total number of PGY-2 through PGY-4 residents at each site ranged from 127 to 275 over the study period, with a total of 865 residents at all sites who participated in this study. Of the 865 residents in training at the four sites, 215 residents received a total of 405 CCC actions. Of these 215 residents, 118 residents received at least one *Unsatisfactory* designation on the ABA Record of Training/CCC Report. Across sites, the proportion of residents receiving CCC actions and *Unsatisfactory* designations varied considerably, from 13 to 51% for CCC actions and from 3 to 37% for *Unsatisfactory* designations.

### Graduation and ABA Board Certification Rates

There was no significant difference in overall graduation rates among the four sites (97 to 98%, *P* = 0.96, Fisher exact test, table 2). The proportion of entering residents who achieved board certification varied from 96 to 98% (*P* = 0.78, Fisher exact test) among the four residency programs.

When we compared residents who were the subject of any CCC action (*n* = 215) to residents who were not the subject of CCC actions (*n* = 650), we found a difference in their graduation rate (93 *vs.* 99%, respectively; *P* < 0.001; OR: 0.08, 95% CI: 0.03 to 0.23, after controlling for site, table 3). The board certification rate of residents who were subject to CCC action was also different from that of residents who did not receive CCC actions (89 *vs.* 99%, respectively; *P* < 0.001; OR: 0.04, 95% CI: 0.02 to 0.13, after controlling

**Table 2.** Graduation and Board Certification Rates—All Residents

| Site                           | Program A | Program B | Program C | Program D | Total (%) |
|--------------------------------|-----------|-----------|-----------|-----------|-----------|
| All residents 2000–2009        | 127       | 249       | 275       | 214       | 865       |
| Graduates (%) <sup>*</sup>     | 124 (98)  | 244 (98)  | 269 (98)  | 208 (97)  | 845 (98)  |
| ABA certified (%) <sup>†</sup> | 122 (96)  | 243 (98)  | 266 (97)  | 206 (96)  | 837 (97)  |

<sup>\*</sup>*P* = 0.96 (Fisher exact test) for comparisons of graduation across the four sites (Programs A to D). <sup>†</sup>*P* = 0.78 (Fisher exact test) for comparisons of American Board of Anesthesiology (ABA) certification across the four sites (Programs A to D).

**Table 3.** Graduation and Board Certification Rates—Residents Receiving *versus* Not Receiving CCC Actions

| Site                                       | Program A | Program B | Program C | Program D | Total (%) |
|--------------------------------------------|-----------|-----------|-----------|-----------|-----------|
| Residents <b>not receiving</b> CCC actions | 107       | 217       | 221       | 105       | 650       |
| Graduates (%) <sup>*</sup>                 | 107 (100) | 217 (100) | 217 (98)  | 105 (100) | 646 (99)  |
| ABA certified (%) <sup>†</sup>             | 107 (100) | 217 (100) | 217 (98)  | 105 (100) | 646 (99)  |
| Residents <b>receiving</b> CCC action      | 20        | 32        | 54        | 109       | 215       |
| Graduates (%) <sup>*</sup>                 | 17 (85)   | 27 (84)   | 52 (96)   | 103 (94)  | 199 (93)  |
| ABA certified (%) <sup>†</sup>             | 15 (75)   | 26 (81)   | 49 (91)   | 101 (93)  | 191 (89)  |

<sup>\*</sup>*P* < 0.001, after controlling for site, for comparisons of graduation between all residents receiving and not receiving Clinical Competency Committee (CCC) actions. <sup>†</sup>*P* < 0.001, after controlling for site, for comparisons of American Board of Anesthesiology (ABA) certification between all residents receiving and not receiving CCC actions.



**Table 4.** Graduation and Board Certification Rates—Residents Receiving *versus* Not Receiving *Unsatisfactory* Designations

| Site                                                             | Program A | Program B | Program C | Program D | Total (%) |
|------------------------------------------------------------------|-----------|-----------|-----------|-----------|-----------|
| Residents <b>not receiving</b> <i>Unsatisfactory</i> designation | 121       | 224       | 268       | 134       | 747       |
| Graduates (%) <sup>*</sup>                                       | 119 (98)  | 224 (100) | 264 (99)  | 134 (100) | 741 (99)  |
| ABA certified (%) <sup>†</sup>                                   | 118 (98)  | 224 (100) | 261 (97)  | 134 (100) | 737 (99)  |
| Residents <b>receiving</b> <i>Unsatisfactory</i> designation     | 6         | 25        | 7         | 80        | 118       |
| Graduates (%) <sup>*</sup>                                       | 5 (83)    | 20 (80)   | 5 (71)    | 74 (92)   | 104 (88)  |
| ABA certified (%) <sup>†</sup>                                   | 4 (67)    | 19 (76)   | 5 (71)    | 72 (90)   | 100 (85)  |

<sup>\*</sup> $P < 0.001$ , after controlling for site, for comparison of graduation between all residents receiving and not receiving *Unsatisfactory* designations. <sup>†</sup> $P < 0.001$ , after controlling for site, for comparison of American Board of Anesthesiology (ABA) certification between all residents receiving and not receiving *Unsatisfactory* designations.

**Table 5.** *Unsatisfactory* Ratings to ABA in Essential Attributes *versus* Other Categories

| ABA <i>Unsatisfactory</i> Ratings                     | No. of Residents (% of Column) | Graduates (% of Row)  | ABA Certified (% of Row) |
|-------------------------------------------------------|--------------------------------|-----------------------|--------------------------|
| Total <i>Unsatisfactory</i> Ratings (%)               | 118 (100)                      | 104 (88)              | 100 (85)                 |
| Essential Attributes (%)                              | 11 (9)                         | 6 (55) <sup>*†</sup>  | 5 (45) <sup>†‡</sup>     |
| Other categories (excluding Essential Attributes) (%) | 107 (91)                       | 98 (92) <sup>*†</sup> | 95 (89) <sup>†‡</sup>    |

<sup>\*</sup> $P = 0.0013$  for comparisons of graduation between residents receiving *Unsatisfactory* ratings in Essential Attributes *versus* other categories, after controlling for site. <sup>†</sup>Statistically significant after Bonferroni correction. <sup>‡</sup> $P = 0.0007$  for comparisons of American Board of Anesthesiology (ABA) certification between residents receiving *Unsatisfactory* ratings in Essential Attributes *versus* other categories, after controlling for site.

**Table 6.** Graduation and Board Certification by Number of ACGME Competencies Deficient

| No. of Deficient ACGME Competencies             | 0        | 1        | 2       | 3       | 4      | 5      | 6      |
|-------------------------------------------------|----------|----------|---------|---------|--------|--------|--------|
| Total number of residents                       | 650      | 120      | 40      | 31      | 14     | 4      | 6      |
| Graduates (% of column total) <sup>*†</sup>     | 646 (99) | 116 (97) | 39 (97) | 30 (97) | 9 (64) | 3 (75) | 2 (33) |
| ABA certified (% of column total) <sup>†‡</sup> | 646 (99) | 114 (95) | 37 (92) | 27 (87) | 8 (57) | 3 (75) | 2 (33) |

<sup>\*</sup> $P < 0.0001$  for comparison of the ordinal trend of graduation between residents receiving deficiencies in varying numbers of competencies, after controlling for site. <sup>†</sup>Statistically significant after Bonferroni correction. <sup>‡</sup> $P < 0.0001$  for comparison of the ordinal trend of American Board of Anesthesiology (ABA) certification between residents receiving deficiencies in varying numbers of competencies, after controlling for site.

ACGME = Accreditation Council for Graduate Medical Education.

for site). Among residents receiving CCC actions who ultimately graduated ( $n = 199$ ), 191 achieved board certification.

When residents who received one or more *Unsatisfactory* rating(s) on an ABA Record of Training/CCC Report ( $n = 118$ ) were compared to residents who received all *Satisfactory* ratings ( $n = 747$ ), there was a difference in the graduation rate (88 *vs.* 99%, respectively;  $P < 0.001$ ; OR: 0.03, 95% CI: 0.01 to 0.10, after controlling for site) and board certification rate (85 *vs.* 99%, respectively,  $P < 0.001$ ; OR: 0.04, 95% CI: 0.01 to 0.09, after controlling for site, table 4). Among residents receiving one or more *Unsatisfactory* ratings who graduated ( $n = 104$ ), 100 achieved board certification.

### Residents Receiving CCC Actions

The CCC might take one of several actions when confronted with a resident who was not meeting performance expectations. Of the 215 residents who received actions by the CCC, 204 received verbal counseling, 102 received written counseling, 118 received at least one grade of *Unsatisfactory* on the ABA Record of Training/CCC Report, and 24 were placed on probation according to the criteria of their institution.

The number of deficient ACGME Core Competencies varied among residents who were placed on probation. In descending order, the performance gaps were noted in Patient Care ( $n = 21$ ), Professionalism ( $n = 19$ ), Interpersonal and Communication Skills ( $n = 15$ ), Medical Knowledge ( $n = 10$ ), Practice-based Learning ( $n = 8$ ), and Systems-based Practice ( $n = 5$ ). Of the 24 residents placed on probation, 16 residents graduated (66%); of these, 15 residents went on to achieve board certification.

### Residents with *Unsatisfactory* Designations on ABA Record of Training/CCC Reports

The overall graduation rate of residents receiving any *Unsatisfactory* designation was 88% (table 4). Of the total cohort of 865 residents, 11 residents received a primary *Unsatisfactory* rating in an Essential Attribute (has no documented abuse of alcohol or illegal use of drugs ( $n = 4$ ), learns from experience, knows limits ( $n = 2$ ), demonstrates honesty, integrity, reliability, and responsibility ( $n = 2$ ), reacts to stressful situations in an appropriate manner ( $n = 2$ ), and demonstrates high standards of ethical and moral behavior ( $n = 1$ ), (table 5). Seven of these residents were placed on probation. Of the

residents with *Unsatisfactory* ratings reported to the ABA, those who were lacking Essential Attributes were far less likely to graduate compared to those lacking in other categories (55 vs. 92% for those without a rating of *Unsatisfactory* in an Essential Attribute,  $P = 0.0013$ ; OR: 0.09, 95% CI: 0.02 to 0.37, after controlling for site).

Of the residents with *Unsatisfactory* ratings reported to the ABA, those who were lacking Essential Attributes were far less likely to obtain ABA certification than those lacking in other categories (45 vs. 89%, respectively;  $P = 0.0007$ ; OR: 0.08, 95% CI: 0.02 to 0.34, after controlling for site). The overall board certification rate among residents receiving any *Unsatisfactory* designation on the ABA Record of Training/CCC Report was 85%.

### Graduation by Number of Deficient ACGME Core Competencies

The CCC assessed the presence or absence of a deficiency in any ACGME Core Competency. Table 6 shows the number of residents by number of ACGME competencies deficient as well as the graduation and board certification rates for each group. For both outcomes (graduation and board certification), the rates decreased for residents with more deficiencies ( $P < 0.0001$ , after controlling for site).

### Frequency of Deficiencies in ACGME Core Competencies

Table 7 shows the number of residents across all four programs with deficiencies in an ACGME Core Competency. Medical Knowledge was the most commonly deficient competency (128 residents), followed by Patient Care ( $n = 78$ ), Professionalism ( $n = 75$ ), and Communication and Interpersonal Skills ( $n = 74$ ). Practice-based Learning and Improvement and Systems-based Practice were the least commonly deficient competencies ( $n = 37$  and  $n = 13$ , respectively).

### Time from Graduation to Board Certification

The median time from graduation to certification for residents in trouble was 15 months (interquartile range: 10 to 20 months). All residents who ultimately became certified did so within 5 yr. Two graduates who were not board-certified were followed for less than 5 yr. All statistically significant findings remained significant after a sensitivity analysis was done to determine whether a change in board certification status of these two residents would affect our findings.

### Remediation

A variety of remediation methods were utilized at all four sites in order to support all residents in trouble. Each program provided a list of the remediation techniques used to address the various deficiencies. An aggregate list is presented in table 8.

### Discussion

#### Primary Findings and Significance

*Deficiencies in multiple ACGME Core Competencies threaten graduation and board certification.* Multiple deficiencies significantly decrease the likelihood of graduation and board certification, particularly when more than three ACGME Core Competency categories are involved. Roughly 3% of our study population was deficient in four or more categories. Residents with deficiencies in fewer categories are likely to graduate.

*Essential Attributes are essential.* Although deficiencies in an Essential Attribute were limited to a small group of residents (1.3% of the study population), the graduation and board certification rates of these residents were significantly decreased. An *Unsatisfactory* rating in an Essential Attribute represents a similar threat to graduation as deficiencies in multiple competency categories. Board certification rates drop below 50% for residents with deficiencies in an Essential Attribute. Deficits in Essential Attributes are known to be challenging to remediate.<sup>1</sup> Substance abuse, which falls into the category of Essential Attribute deficiency, was found in 0.5% of the study population. In a large study that focused on substance abuse, the graduation and certification rates were significantly decreased, similar to the respective rates of residents with Essential Attribute deficiencies in this study.<sup>22</sup>

*Graduation rates are high overall.* Even residents in trouble are likely to graduate when deficiencies are isolated and do not involve Essential Attributes. Despite documented difficulties in performance during training, residents receiving CCC actions, with or without *Unsatisfactory* ratings, experienced a five percentage point drop in graduation rate compared to those without deficiencies.

*Board certification rates are high overall.* Even residents in trouble are likely to become board-certified when deficiencies are isolated and do not involve Essential Attributes. However, residents receiving CCC actions had lower

**Table 7.** Frequency of the Most Common ACGME Competency Deficiencies

| ACGME Competency                       | No. Deficient, N = 865 (%) | Graduation (% of Row) | ABA Certification (% of Row) |
|----------------------------------------|----------------------------|-----------------------|------------------------------|
| Medical Knowledge                      | 128 (15)                   | 117 (91)              | 113 (88)                     |
| Patient Care                           | 78 (9)                     | 65 (83)               | 59 (76)                      |
| Professionalism                        | 75 (9)                     | 65 (87)               | 63 (84)                      |
| Communication and Interpersonal Skills | 74 (9)                     | 65 (88)               | 61 (82)                      |
| Practice-based Learning/Improvement    | 37 (4)                     | 28 (76)               | 25 (68)                      |
| Systems-based Practice                 | 13 (2)                     | 7 (54)                | 7 (54)                       |

ABA = American Board of Anesthesiology; ACGME = Accreditation Council for Graduate Medical Education.

**Table 8.** Remediation

| Remediation Tools                                                          | ACGME Competencies Targeted                                                                      |
|----------------------------------------------------------------------------|--------------------------------------------------------------------------------------------------|
| Mentor meeting/action plan development                                     | All competencies                                                                                 |
| Learning assessment                                                        | Patient Care, Medical Knowledge                                                                  |
| Board review sessions/standardized tests (e.g., Anesthesia Knowledge Test) | Patient Care, Medical Knowledge                                                                  |
| Mandatory reading/lectures/conferences                                     | Patient Care, Medical Knowledge                                                                  |
| Limit away rotations and/or change rotations                               | All competencies                                                                                 |
| Additional 1:1 operating room training                                     | All competencies                                                                                 |
| Written case management worksheets with mentor follow-up                   | Patient Care, Medical Knowledge, Practice-based Learning and Improvement, Systems-based Practice |
| Assignments with consistent faculty                                        | All competencies                                                                                 |
| Assign different faculty advisor                                           | All competencies                                                                                 |
| Extend training                                                            | All competencies                                                                                 |
| Repeated rotations                                                         | Patient Care, Medical Knowledge, Practice-based Learning and Improvement                         |
| Simulation                                                                 | All competencies                                                                                 |
| Leave of absence                                                           | Personal matters related to any competencies                                                     |
| Stress reduction/emotional intelligence/anger management                   | Interpersonal and Communication Skills, Professionalism                                          |
| Referrals to psychiatry/cultural sensitivity                               | Interpersonal and Communication Skills, Professionalism                                          |
| Cognitive behavioral therapy                                               | Interpersonal and Communication Skills, Professionalism                                          |
| English as a second language                                               | Interpersonal and Communication Skills                                                           |
| Physician health/rehabilitation/drug diversion                             | Patient Care, Interpersonal and Communication Skills, Professionalism                            |
| Withhold academic allowance                                                | All competencies                                                                                 |
| Self-evaluation/360° evaluation                                            | All competencies                                                                                 |

This table represents a compilation of the various remediation tools used at the four residency training programs and the Accreditation Council for Graduate Medical Education (ACGME) competencies targeted.

board certification rates than graduation rates (89 vs. 93%, respectively).

*The most common deficiency was in the ACGME category Medical Knowledge.* A comparison of the frequency of deficiencies in ACGME Core Competencies shows that Medical Knowledge is by far the most common deficient competency, followed by, in approximately equal numbers, Patient Care, Professionalism, and Communication and Interpersonal Skills. This pattern may account for the overall high graduation and certification rates among our residents in trouble, as there are many readily available tools to supplement medical content knowledge.

*The large variation in CCC actions and Unsatisfactory ratings between sites did not affect overall graduation or ABA certification rates.* The proportion of residents who were referred to their respective CCCs varied considerably among the four residencies. We found a similar variation among the four sites in assigning *Unsatisfactory* ratings on ABA Training Reports. However, the programs did not differ from one another in overall graduation and board certification rates.

The variation in CCC referrals and *Unsatisfactory* ratings is related to the academic policy at Program D, which automatically assigns an *Unsatisfactory* in Medical Knowledge to residents who score below predetermined percentile levels on the *In Training Examination*. Using this algorithm results in a larger number of residents at Program D receiving *Unsatisfactory* ratings. Despite the differences between CCC practices at the various institutions, graduation and board certification rates are similar across all four programs.

### Remediation Efforts

Remediation was multipronged and individualized to each resident; various combinations of rewards (educational stipends, eligibility for Chief Resident) and punitive measures (extended training time, *Unsatisfactory* training reports) were used to motivate residents to address deficiencies. A number of similar remediation efforts were employed among the four sites and were tailored to the competency in question. For instance, medical knowledge deficiencies were addressed with required reading, lecture attendance, and use of additional standardized assessments (e.g., the *Anesthesia Knowledge Test*), while patient care deficiencies were addressed by directed clinical assignments. Faculty mentors initially addressed professionalism and communication lapses, while recurring problems frequently led to referrals to behavioral therapists. Generally, program directors and CCCs tried to identify deficiencies early, in order to initiate and escalate remediation as needed.

### Comparison with Previous Research

The prevalence of residents in trouble in the current study (25%) falls within the range previously reported (6 to 26%), although definitions of “residents in trouble” varied.<sup>1,9,10,17</sup> The most commonly deficient ACGME Core Competencies among our residents, Medical Knowledge, Patient Care, and Professionalism, were also consistent with previous findings.<sup>1,20</sup> The graduation and board certification rates among the anesthesiology residents with performance deficits in our study (93 and 89%, respectively) were also comparable to

those found in the 2006 study of family medicine residents (90 and 86%, respectively).<sup>1</sup>

### Study Limitations

Our study was limited by the accuracy and completeness of the records maintained by the residency offices at the four sites. Nevertheless, we were fortunate to have low turnover of residency program personnel during the study period, facilitating data retrieval. Although all the residents included in this study were assessed by the Program Director and CCC Chair (or their designees) using a consensus approach to evaluate the comprehensive records at each site (CCC records, ABA Training Reports, and individual resident files), the reduction of the rich narrative data on each resident to dichotomous variables in a database created the potential for oversimplification of the deficiencies.

Nearly half (44%) of residents with deficiencies in ACGME Core Competency categories had deficiencies in two or more categories, making it difficult to isolate the impact of a deficiency in a single competency on graduation or board certification. Despite the size of the cohort in this multicenter study, an assessment of interaction effects between deficiencies in two or more ACGME Core Competency categories was not feasible.

Our study may also suffer from selection bias. Although the residency programs in this study are large and geographically diverse, they are all university based and may not be representative of anesthesiology training programs as a whole.

Several residents who entered the study during the last several years of enrollment had a shorter follow-up period during which to become board-certified. After a sensitivity analysis designed to see if our results would change if they were to become certified, *P* values and CIs only changed slightly, and overall conclusions were not affected.

This study was not designed to provide data on the effectiveness of remediation methods. Programs typically employ several remediation strategies simultaneously, which limits assessments of individual remediation strategies.

The ACGME provides guidance to residency training programs regarding the structure and function of program CCCs.<sup>23,24</sup> Nevertheless, every CCC operates according to internally developed policies and procedures. Milestones have now been created in an effort to create a standardized assessment of all residents across programs; however, the ACGME milestones did not exist during the period of our study.

### Conclusions

There was a wide variability in the proportion of residents receiving CCC actions at the four programs. This difference between programs did not affect overall graduation rates; however, it does indicate a lack of standardization in CCC practices across programs. The current study indicates that specialty-wide policies and procedures for CCCs might assist training programs in making comparisons across programs.

Standard operating procedures for all CCCs would promote internal and external consistency among programs, maintain efficiency and quality control, and provide transparency. Organizational or regulatory bodies may be helpful in establishing best practices for CCCs.

The graduation and board certification rates we have reported may serve as a benchmark for other anesthesiology programs. Graduation and board certification rates were consistently high across the four programs. There was a small reduction in graduation and board certification rates for residents receiving CCC actions for ACGME Core Competencies; nevertheless, these residents were still more likely than not to graduate in good standing and achieve board certification, perhaps due to successful remediation strategies by the training programs. Notably, performance problems in Essential Attributes carry a poor prognosis and suggest that remediation efforts may not be satisfactory, or that it may not be possible to remediate these problems in anesthesiology training. Another risk factor for failure to graduate or to achieve board certification is the presence of deficiencies in multiple ACGME Core Competency categories. Although it is beyond the scope of our data to provide an analysis of the usefulness of specific remediation techniques, it would be helpful if future work in this area examined which remediation methods are most efficient and effective in correcting particular deficiencies.

### Acknowledgments

The authors thank Erin Lacey, M.S., Massachusetts General Hospital, Boston, Massachusetts, and Allison Glover, B.A., University of Colorado School of Medicine, Denver, Colorado, for data collection and coordination.

### Research Support

This study was supported by the authors' institutions: Department of Anesthesiology and Perioperative Medicine, David Geffen School of Medicine at University of California, Los Angeles, Los Angeles, California; Department of Anesthesia, Critical Care and Pain Medicine, Harvard Medical School, Massachusetts General Hospital, Boston, Massachusetts; Department of Anesthesia and Perioperative Care, University of California, San Francisco, San Francisco, California; and Department of Anesthesiology, University of Colorado School of Medicine, Denver, Colorado. Statistical analyses described were partially supported by National Institutes of Health/National Center for Advancing Translational Science UCLA Clinical and Translational Science Institute grant number UL1TR000124.

### Competing Interests

The authors declare no competing interests.

### Correspondence

Address correspondence to Dr. Steadman: Department of Anesthesiology and Perioperative Medicine, Box 957403, 757 Westwood Blvd, Suite 3325, RRUMC, Los Angeles, California 90095-7403. rsteadman@mednet.ucla.edu. Information on



purchasing reprints may be found at [www.anesthesiology.org](http://www.anesthesiology.org) or on the masthead page at the beginning of this issue. ANESTHESIOLOGY's articles are made freely accessible to all readers, for personal use only, 6 months from the cover date of the issue.

## References

1. Reamy BV, Harman JH: Residents in trouble: An in-depth assessment of the 25-year experience of a single family medicine residency. *Fam Med* 2006; 38:252–7
2. Adams KE, Emmons S, Romm J: How resident unprofessional behavior is identified and managed: A program director survey. *Am J Obstet Gynecol* 2008; 198:692.e1–4; discussion 692.e4–5
3. Bernstein S, Atkinson AR, Martimianakis MA: Diagnosing the learner in difficulty. *Pediatrics* 2013; 132:210–2
4. Domen RE: Resident remediation, probation, and dismissal basic considerations for program directors. *Am J Clin Pathol* 2014; 141:784–90
5. Guerrasio J, Aagaard EM: Methods and outcomes for the remediation of clinical reasoning. *J Gen Intern Med* 2014; 29:1607–14
6. Guerrasio J, Garrity MJ, Aagaard EM: Learner deficits and academic outcomes of medical students, residents, fellows, and attending physicians referred to a remediation program, 2006–2012. *Acad Med* 2014; 89:352–8
7. Katz ED, Dahms R, Sadosty AT, Stahmer SA, Goyal D; CORD-EM Remediation Task Force: Guiding principles for resident remediation: Recommendations of the CORD remediation task force. *Acad Emerg Med* 2010; 17(suppl 2):S95–103
8. Ratan RB, Pica AG, Berkowitz RL: A model for instituting a comprehensive program of remediation for at-risk residents. *Obstet Gynecol* 2008; 112:1155–9
9. Resnick AS, Mullen JL, Kaiser LR, Morris JB: Patterns and predictions of resident misbehavior—A 10-year retrospective look. *Curr Surg* 2006; 63:418–25
10. Roback HB, Crowder MK: Psychiatric resident dismissal: A national survey of training programs. *Am J Psychiatry* 1989; 146:96–8
11. Rosenblatt MA, Schartel SA: Evaluation, feedback, and remediation in anesthesiology residency training: A survey of 124 United States programs. *J Clin Anesth* 1999; 11:519–27
12. Steinert Y: The “problem” learner: Whose problem is it? AMEE Guide No. 76. *Med Teach* 2013; 35:e1035–45
13. Stirling K, Hogg G, Ker J, Anderson F, Hanslip J, Byrne D: Using simulation to support doctors in difficulty. *Clin Teach* 2012; 9:285–9
14. Torbeck L, Canal DF: Remediation practices for surgery residents. *Am J Surg* 2009; 197:397–402
15. Weizberg M, Smith JL, Murano T, Silverberg M, Santen SA: What does remediation and probation status mean? A survey of emergency medicine residency program directors. *Acad Emerg Med* 2015; 22:113–6
16. Williams RG, Roberts NK, Schwind CJ, Dunnington GL: The nature of general surgery resident performance problems. *Surgery* 2009; 145:651–8
17. Yao DC, Wright SM: National survey of internal medicine residency program directors regarding problem residents. *JAMA* 2000; 284:1099–104
18. Yao DC, Wright SM: The challenge of problem residents. *J Gen Intern Med* 2001; 16:486–92
19. Zbieranowski I, Takahashi SG, Verma S, Spadafora SM: Remediation of residents in difficulty: A retrospective 10-year review of the experience of a postgraduate board of examiners. *Acad Med* 2013; 88:111–6
20. Dupras DM, Edson RS, Halvorsen AJ, Hopkins RH Jr, McDonald FS: “Problem residents”: Prevalence, problems and remediation in the era of core competencies. *Am J Med* 2012; 125:421–5
21. Bergen PC, Littlefield JH, O’Keefe GE, Rege RV, Anthony TA, Kim LT, Turnage RH: Identification of high-risk residents. *J Surg Res* 2000; 92:239–44
22. Warner DO, Berge K, Sun H, Harman A, Hanson A, Schroeder DR: Substance use disorder among anesthesiology residents, 1975–2009. *JAMA* 2013; 310:2289–96
23. Accreditation Council for Graduate Medical Education: Anesthesiology, Revised July 1, 2016. Available at: <http://www.acgme.org/Specialties/Program-Requirements-and-FAQS-and-Applications/pfcid/6/Anesthesiology>. Accessed April 20, 2016
24. Andolsek K, Padmore J, Hauer KE, Holmboe E: Clinical Competency Committees: A Guidebook for Programs, Accreditation Council for Graduate Medical Education, 2015. Available at: <https://www.acgme.org/acgmeweb/Portals/0/ACGMEClinicalCompetencyCommitteeGuidebook.pdf>. Accessed November 2, 2015
